# Supplementary material
Source: PubMed Central journal article supplement (PMC7614377)
Supplement: EMS172607-supplement-Appendix.pdf [file EMS172607-supplement-Appendix.pdf]

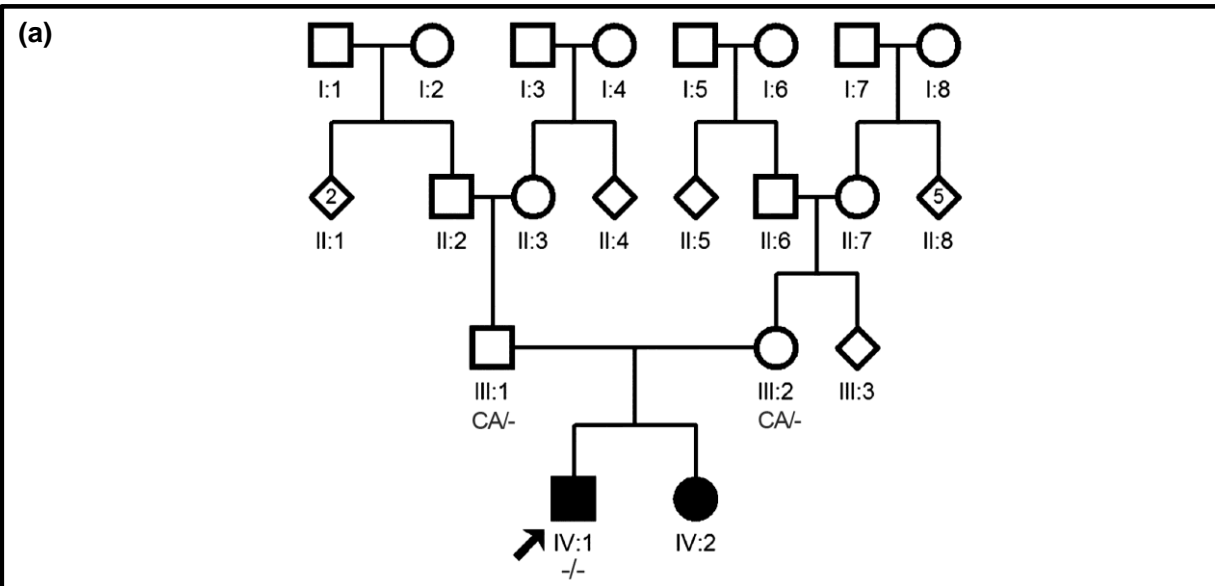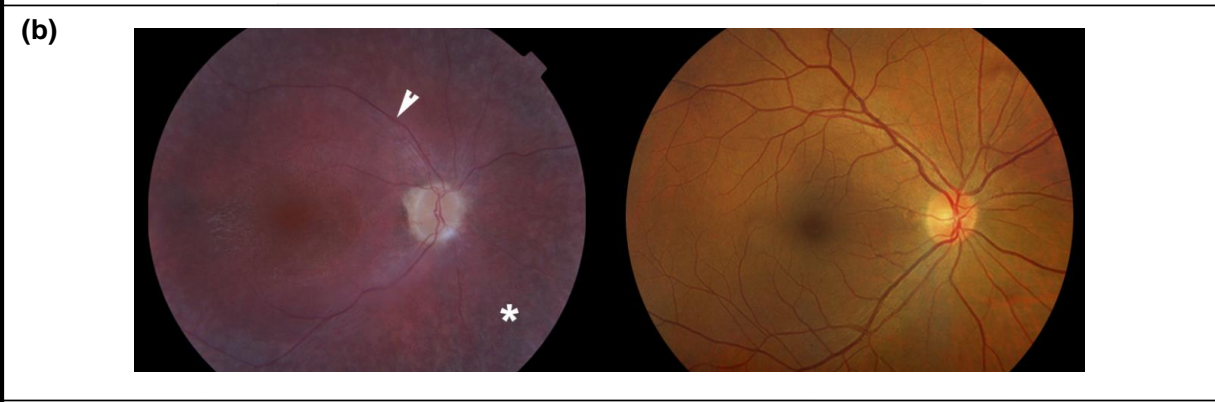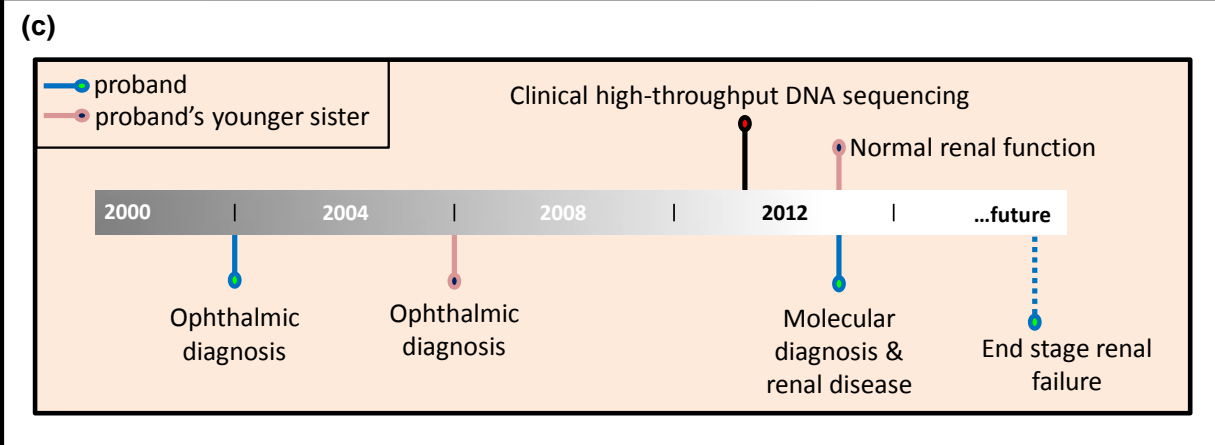

**Figure S1. (a) family pedigree**, showing the segregation of *IQCB1* c.1119\_1120delCA (-, deletion present; CA, deletion absent) with infantile-onset retinal dystrophy (*closed circles*) in a British family. **(b) colour fundus photographs**, showing the back of the right eye of our case (12 years old; *left*) and an unaffected control individual (28 years old; *right*). Attenuation of retinal vessels (*arrowheads*) and midperipheral fine pigment mottling (*asterisk*) is observed and is consistent with a rod-cone retinal dystrophy. **(c) disease history timeline**, showing the order of key clinical events in the proband and his sister.

**Table S1. Specified transcripts for 105 genes analysed in the proband's DNA after referral to the clinical molecular diagnostic service for inherited retinal disease.**

| HGNC     | RefSeq Transcript ID | HGNC    | RefSeq Transcript ID | HGNC     | RefSeq Transcript ID |
|----------|----------------------|---------|----------------------|----------|----------------------|
| ABCA4    | NM_000350.2          | PRPF31  | NM_015629.3          | IMPG2    | NM_016247.3          |
| ADAM9    | NM_003816.2          | PRPF6   | NM_012469.3          | KCNV2    | NM_133497.3          |
| AIPL1    | NM_014336.3          | PRPF8   | NM_006445.3          | KLHL7    | NM_001031710.2       |
| ARL6     | NM_032146.3          | PRPH2   | NM_000322.4          | IMPG2    | NM_016247.3          |
| BBS1     | NM_024649.4          | RAX2    | NM_032753.3          | KCNV2    | NM_133497.3          |
| BBS10    | NM_024685.3          | RBP3    | NM_002900.2          | KLHL7    | NM_001031710.2       |
| BBS12    | NM_001178007.1       | RD3     | NM_183059.2          | LCA5     | NM_181714.3          |
| BBS2     | NM_031885.3          | RDH12   | NM_152443.2          | LRAT     | NM_004744.3          |
| BBS4     | NM_033028.3          | RDH5    | NM_001199771.1       | LRP5     | NM_002335.2          |
| BBS5     | NM_152384.2          | RGR     | NM_002921.3          | MERTK    | NM_006343.2          |
| BBS7     | NM_176824.2          | RGS9    | NM_001165933.1       | MKKS     | NM_018848.2          |
| BBS7     | NM_018190.3          | RGS9    | NM_003835.3          | MKS1     | NM_001165927.1       |
| BBS9     | NM_198428.2          | RHO     | NM_000539.3          | MKS1     | NM_017777.3          |
| BEST1    | NM_004183.3          | RIMS1   | NM_014989.4          | MYO7A    | NM_000260.3          |
| C1QTNF5  | NM_015645.3          | RIMS1   | NM_001168407.1       | NDP      | NM_000266.3          |
| C2orf71  | NM_001029883.1       | CRB1    | NM_201253.2          | RIMS1    | NM_001168410.1       |
| CA4      | NM_000717.3          | CRX     | NM_000554.4          | RLBP1    | NM_000326.4          |
| CACNA2D4 | NM_172364.4          | DFNB31  | NM_015404.3          | ROM1     | NM_000327.3          |
| CDH23    | NM_022124.5          | DHDDS   | NM_024887.2          | RP1      | NM_006269.1          |
| CDHR1    | NM_001171971.1       | EFEMP1  | NM_001039348.2       | RP1L1**  | NM_178857.5          |
| CDHR1    | NM_033100.2          | ELOVL4  | NM_022726.3          | RP2      | NM_006915.2          |
| CEP290*  | NM_025114.3          | EYS     | NM_001142800.1       | RP9      | NM_203288.1          |
| CERKL    | NM_001030311.2       | FAM161A | NM_001201543.1       | RPE65    | NM_000329.2          |
| CHM      | NM_000390.2          | FSCN2   | NM_001077182.2       | RPGR***  | NM_001034853.1       |
| CLRN1    | NM_052995.2          | FZD4    | NM_012193.3          | RPGRIP1  | NM_020366.3          |
| CLRN1    | NM_001195794.1       | GNAT2   | NM_005272.3          | RS1      | NM_000330.3          |
| CNGA1    | NM_001142564.1       | GPR98   | NM_032119.3          | SAG      | NM_000541.4          |
| CNGA3    | NM_001298.2          | GUCA1A  | NM_000409.3          | SEMA4A   | NM_022367.3          |
| CNGB1    | NM_001297.4          | GUCA1B  | NM_002098.5          | SNRNP200 | NM_014014.4          |
| CNGB3    | NM_019098.4          | GUCY2D  | NM_000180.3          | SPATA7   | NM_018418.4          |
| NR2E3    | NM_014249.2          | IDH3B   | NM_006899.2          | TEAD1    | NM_021961.5          |
| NRL      | NM_006177.3          | IDH3B   | NM_174855.1          | TIMP3    | NM_000362.4          |
| OTX2     | NM_021728.2          | IMPDH1  | NM_000883.3          | TOPORS   | NM_005802.4          |
| PCDH15   | NM_001142763.1       | IMPG2   | NM_016247.3          | TRIM32   | NM_012210.3          |
| PCDH15   | NM_001142769.1       | KCNV2   | NM_133497.3          | TTC8     | NM_144596.2          |
| PCDH15   | NM_001142771.1       | KLHL7   | NM_001031710.2       | TULP1    | NM_003322.3          |
| PCDH15   | NM_001142770.1       | LCA5    | NM_181714.3          | UNC119   | NM_005148.3          |
| PDE6A    | NM_000440.2          | LRAT    | NM_004744.3          | UNC119   | NM_054035.2          |
| PDE6B    | NM_000283.3          | LRP5    | NM_002335.2          | USH1C    | NM_005709.3          |
| PDE6C    | NM_006204.3          | MERTK   | NM_006343.2          | USH1C    | NM_153676.3          |
| PDE6G    | NM_002602.3          | MKKS    | NM_018848.2          | USH1G    | NM_173477.2          |
| PITPNM3  | NM_031220.3          | MKS1    | NM_001165927.1       | USH2A    | NM_206933.2          |
| PRCD     | NM_001077620.2       | MKS1    | NM_017777.3          | ZNF513   | NM_144631.5          |
| PROM1    | NM_006017.2          | MYO7A   | NM_000260.3          |          |                      |
| PRPF3    | NM_004698.2          | NDP     | NM_000266.3          |          |                      |

\* Testing of the intronic mutation c.2991+1655A>G in the *CEP290* gene is included in this analysis

\*\* Analysis of the coding region of exon 4 of the *RP1L1* gene is not included

\*\*\* Analysis of the coding region of the final exon (*orf15*) of the *RPGR* gene is not included

**Table S2. Selected previously reported cases with the homozygous two nucleotide deletion in *IQCB1***

**(chr3:121491452\_121491453delCA, *hg19*) detected in the proband's DNA sample during the analysis of whole exome sequencing data.**

| <b>Origin</b>  | <b>Current age</b> | <b>Parent consanguinity</b> | <b>Affected siblings</b> | <b>Age of RD</b>          | <b>Age of ESRD</b>                                                         | <b>Reference</b> |
|----------------|--------------------|-----------------------------|--------------------------|---------------------------|----------------------------------------------------------------------------|------------------|
| <b>British</b> | 13                 | No                          | Yes                      | 2 months                  | kidney dysfunction detected before ESRD<br><i>expected within 6 months</i> | This study       |
| <b>USA</b>     | -                  | Not reported                | Not reported             | Present, age not reported | 15 yrs                                                                     | 7                |
| <b>Brazil</b>  | -                  | Not reported                | Not reported             | Present, age not reported | 12 yrs                                                                     | 7                |
| <b>Germany</b> | -                  | Not reported                | Not reported             | Present, age not reported | >10 yrs                                                                    | 7                |
| <b>USA</b>     | -                  | Not reported                | Not reported             | Present, age not reported | 7 yrs                                                                      | 7                |
| <b>Germany</b> | -                  | No                          | Yes                      | <2 months                 | 12 yrs                                                                     | 8                |
| <b>Germany</b> | -                  | No                          | Not reported             | <2 months                 | <24 yrs                                                                    | 8                |
| <b>Germany</b> | -                  | No                          | Not reported             | Not reported              | 10 yrs                                                                     | 8                |
| <b>Germany</b> | -                  | No                          | Not reported             | <6 months                 | 15 yrs                                                                     | 8                |
| <b>USA</b>     | -                  | Not reported                | Not reported             | <6 months                 | No manifest renal disease at 7 yrs                                         | 9                |

Abbreviations: *RD*, retinal disease; *ESRD*, end stage renal disease.

**Table S3. Predicted consequence of the *IQCB1* mutation found in the proband's DNA sample in all transcripts for the *IQCB1* gene included in the National Centre for Biotechnology Information Reference Sequence database (NCBI RefSeq).** For each transcript the bases deleted from the reference genetic sequence (*top*) in the proband's DNA sample (*bottom*) is indicated by red underlined text. The alteration between black and blue text indicates a change in coding exons. Numerical values refer to the relative position of amino acids (single letter amino acid codes included within solid circles: X, stop codon) within the primary structure of the *IQCB1* protein.

| RefSeq ID    | coding region co-ordinates ( <i>hg19</i> ) | coding region size | number of coding region exons | Variant annotation                   | Exonic location of variant | Expected premature termination |
|--------------|--------------------------------------------|--------------------|-------------------------------|--------------------------------------|----------------------------|--------------------------------|
| NM_001023570 | chr3:121,489,192-121,547,807               | 58,616             | 13                            | c.1518_1519delCA<br>p.His506Glnfs*13 | 12                         | in exon 12                     |

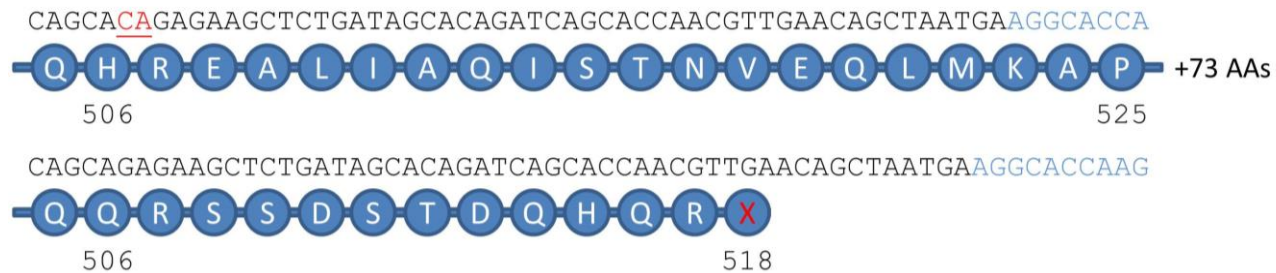

|              |                              |        |    |                                      |   |           |
|--------------|------------------------------|--------|----|--------------------------------------|---|-----------|
| NM_001023571 | chr3:121,489,192-121,547,807 | 58,616 | 10 | c.1119_1120delCA<br>p.His373Glnfs*13 | 9 | in exon 8 |
|--------------|------------------------------|--------|----|--------------------------------------|---|-----------|

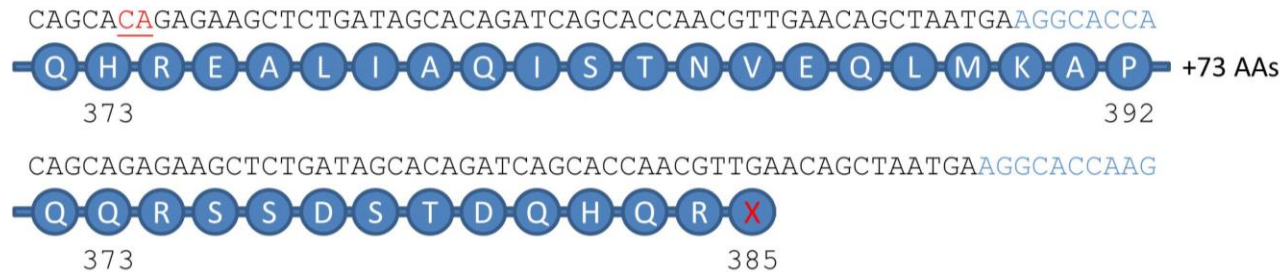

## **SUPPLEMENTAL REFERENCES**

- 1 McKenna A, Hanna M, Banks E, et al. The Genome Analysis Toolkit: a MapReduce framework for analyzing next-generation DNA sequencing data. *Genome Res* 2010; **20**: 1297-303.
- 2 DePristo MA, Banks E, Poplin R, et al. A framework for variation discovery and genotyping using next-generation DNA sequencing data. *Nat Genet* 2011; **43**: 491-8.
- 3 Sherry ST, Ward MH, Kholodov M, et al. dbSNP: the NCBI database of genetic variation. *Nucleic Acids Res* 2001; **29**: 308-11.
- 4 Exome Variant Server, NHLBI GO Exome Sequencing Project, Seattle, WA, USA. <http://evs.gs.washington.edu/EVS/>. (Accessed 01/10/2013).
- 5 Gillespie RL, O'Sullivan J, Ashworth J, et al. Personalized diagnosis and management of congenital cataract by next-generation sequencing. *Ophthalmology* 2014; **121**: 2124-37.
- 6 The 100,000 Genomes Project, Genomics England, London, UK. <http://www.genomicsengland.co.uk/the-100000-genomes-project/>. (Accessed 14/01/2015).
- 7 Halbritter J, Porath JD, Diaz KA, et al. Identification of 99 novel mutations in a worldwide cohort of 1,056 patients with a nephronophthisis-related ciliopathy. *Hum Genet* 2013; **132**: 865-84.
- 8 Otto EA, Loeys B, Khanna H, et al. Nephrocystin-5, a ciliary IQ domain protein, is mutated in Senior-Loken syndrome and interacts with RPGR and calmodulin. *Nat Genet* 2005; **37**: 282-8.
- 9 Stone EM, Cideciyan AV, Aleman TS, et al. Variations in NPHP5 in patients with nonsyndromic leber congenital amaurosis and Senior-Loken syndrome. *Arch Ophthalmol* 2011; **129**: 81-7.
